# Supplementary material for: Fatty Acid Binding Protein 6 Inhibition Decreases Cell Cycle Progression, Migration and Autophagy in Bladder Cancers
Source: MDPI journal article supplement (doi:10.3390/ijms23042154), 2022-02-15
Supplement: s1 [file s1]

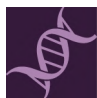

## Supplementary Figures

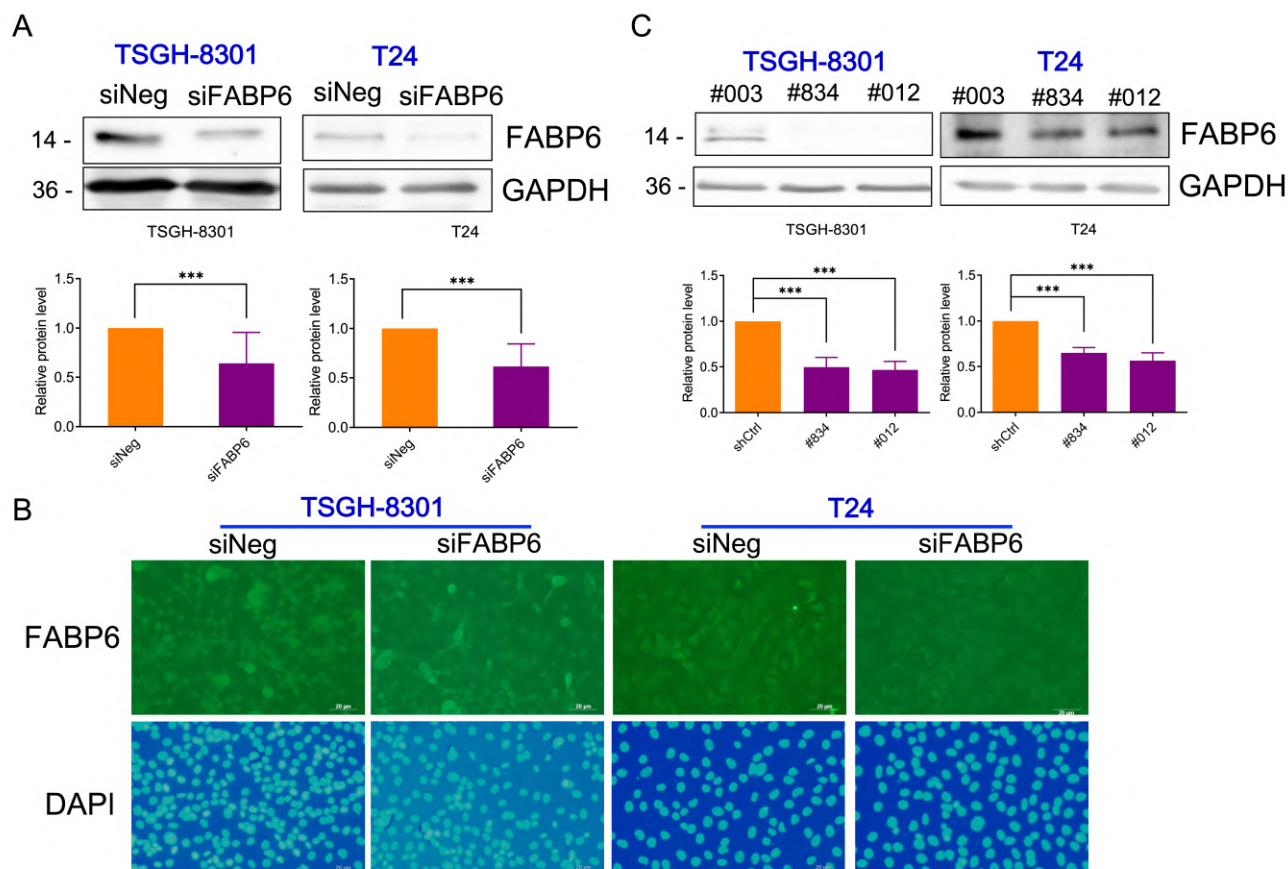

**Supplementary Figure S1.** Reduced FABP6 mRNA and protein expression in TSGH-8301 and T24 BC cells. (A) Quantitative analysis of FABP6 protein expression by western blotting in TSGH-8301 and T24 cells 72 h post-transfection. GAPDH was a loading control. (B) Immunostaining of FABP6 after 72 h post-transfection. (C) Knockdown effects of FABP6 were analyzed by western blotting in TSGH-8301 and T24 cells. Two cell lines were infected by scramble control lentivirus and another two shFABP6 sequences, #834 and #012, were selected. GAPDH was used as a loading control. \*\*\*,  $p < 0.001$  compared to siNegative group or #003 scramble control group.

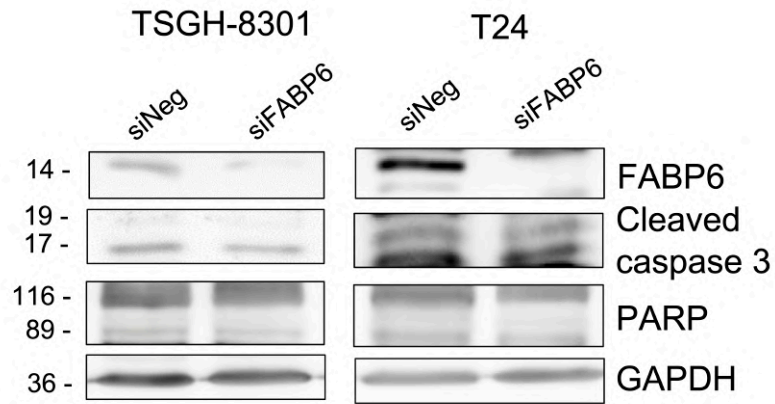

**Supplementary Figure S2.** Knockdown of FABP6 had no effect on apoptotic-related proteins. Western blotting analysis of caspase 3 and PARP expression 72 h after FABP6 knockdown in TSGH-8301 (left) and T24 (right) cells. GAPDH was used as a loading control.

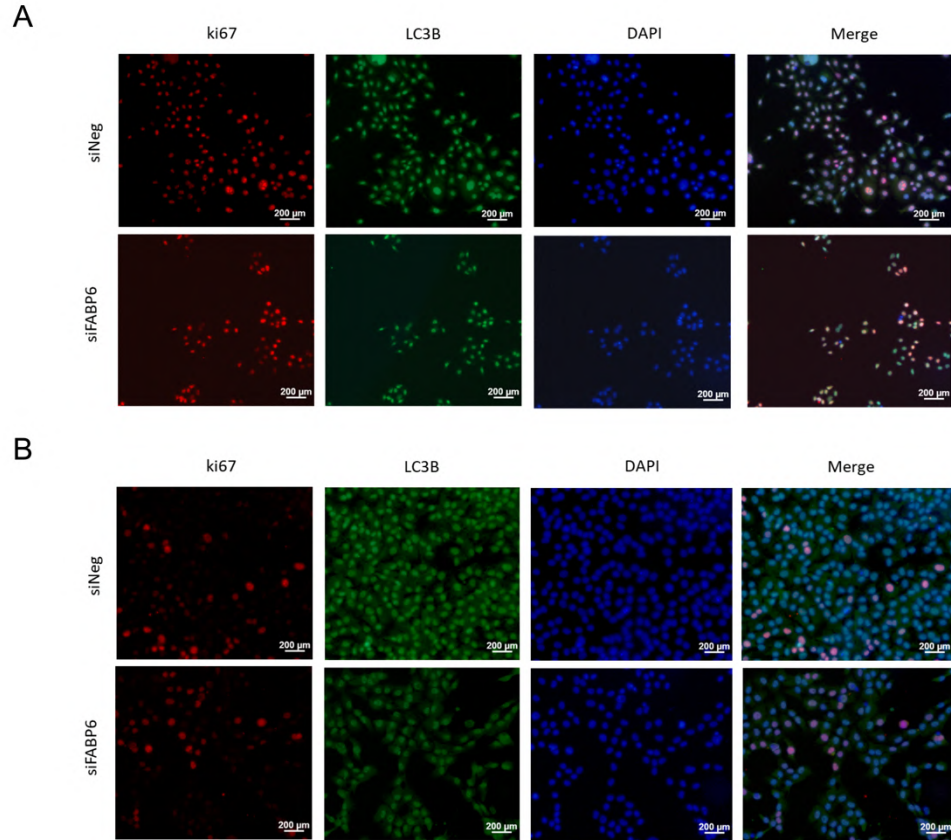

**Supplementary Figure S3.** Ki67 and LC3B immunostaining after FABP6 knockdown. Immunostaining of Ki67 (Red) and LC3B (Green) after 72 h post-transfection. Scale bar = 200  $\mu$ m.

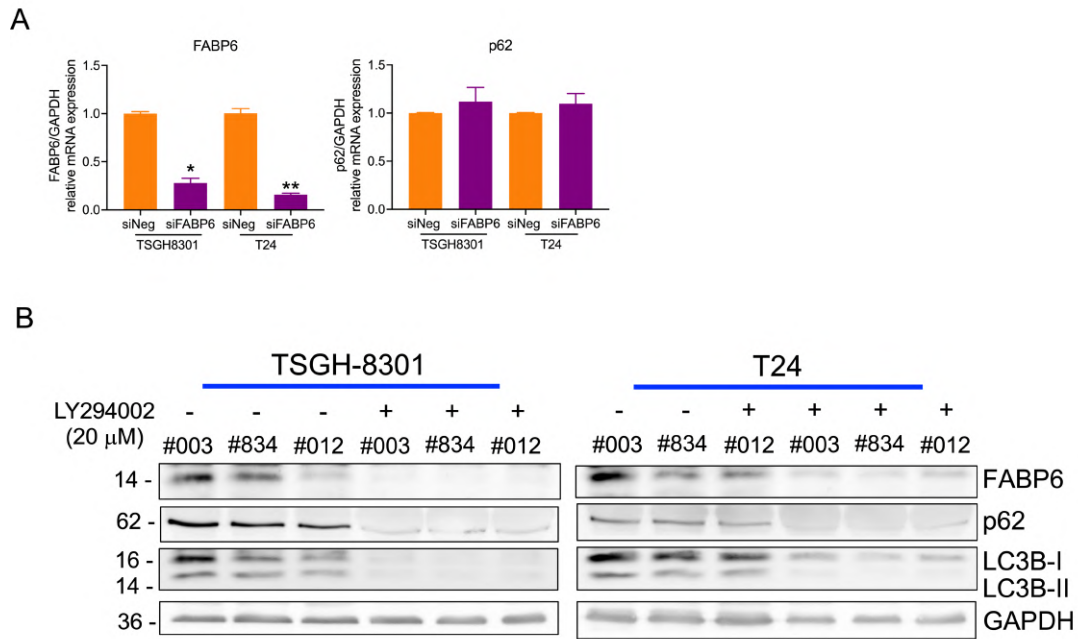

**Supplementary Figure S4.** The effect of LY294002 on p62 and LC3B after FABP6 inhibition. (A) Quantitative real-time PCR was performed after siFABP6 transfected for 72 h. The mRNA of FABP6 and p62 was evaluated in TSGH-8301 and T24 cells. (B) Quantitative analysis of p62 and LCB-II protein expression by western blotting in TSGH-8301 and T24 cells. GAPDH was a loading control. Two cell lines were infected by scramble control lentivirus (#003) and another two shFABP6 sequences, #834 and #012, were selected.

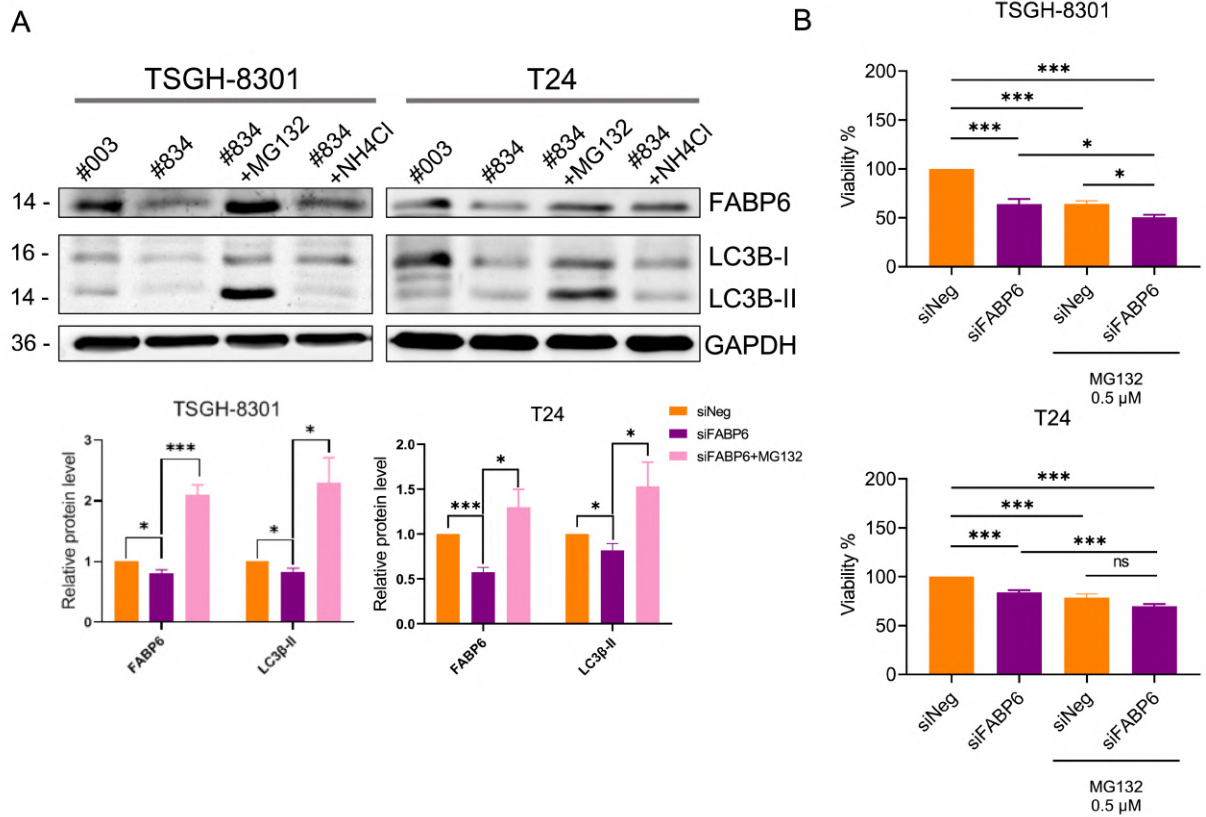

**Supplementary Figure S5.** Proteasome inhibitor MG132 treatment recovered autophagy markers after FABP6 knockdown. (A) In both cell lines showed reduced FABP6 and LC3B-II was recovered by MG132 treatment. (B) MTT assay analysis of proteasome inhibitor MG132 and lysosomal inhibitor NH4Cl treatment after knockdown of FABP6 for 72 h. These data are means  $\pm$  SEM from at least three independent experiments. P value, one-way ANOVA with two tailed t-test. \*,  $p < 0.05$ ; \*\*,  $p < 0.01$ ; \*\*\*,  $p < 0.001$ .

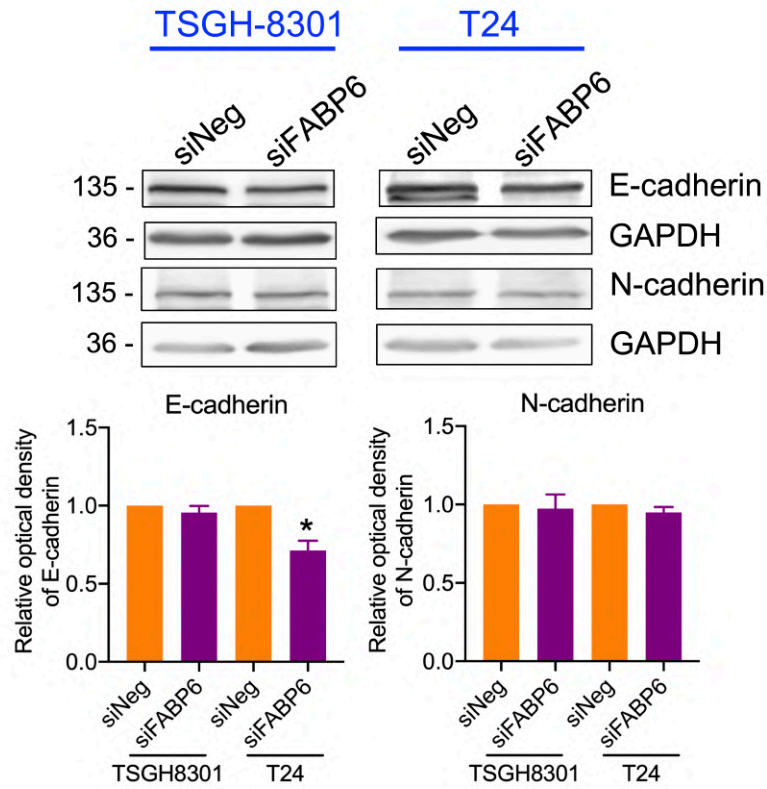

**Supplementary Figure S6.** The effect of E-cadherin and N-cadherin after FABP6 knockdown in BC cells. Quantitative analysis of E-cadherin and N-cadherin protein expression by western blotting in TSGH-8301 and T24 cells 72 h post-transfection. GAPDH was a loading control. \*,  $p < 0.05$  compared to siNegative group.

**Supplementary Table S1. The sequences of siRNAs targeting FABP6**

| Name        | sequence                   | Target     |
|-------------|----------------------------|------------|
| D-00885-01  | 5'-GAAGAAUUAUGAUGAGUUC-3'  | FABP6      |
| D-00885-02  | 5'-GCGGGAAGCUGGUGGUGAA-3'  | FABP6      |
| D-00885-03  | 5'-GGGCAGGACUUCACUUGGU-3'  | FABP6      |
| D-00885-04  | 5'-GCAAGGAAAGCAACAUACA-3'  | FABP6      |
| D-001206-13 | 5'-UAGCGACUAAACACAUCAA-3', | non-target |
|             | 5'-UAAGGCUAUGAAGAGAUAC-3', | non-target |
|             | 5'-AUGUAUUGGCCUGUAUUAG-3', | non-target |
|             | 5'-AUGAACGUGAAUGCUCAA-3'   | non-target |

**Supplementary Table S2. The sequences of shRNAs targeting FABP6**

---

| Name | Sequences |
|------|-----------|
|------|-----------|

---

**Scramble #003 (ASN0000000003)**

**5'-CCGGCCTAAGGTTAAGTCGCCCTCGCTCGAGCGAGGGCGACTTAACCTTAGGTTTTT-3'**

**shFABP6 #834 (TRCN0000419834)**

**5'-CCGGGAATTATGATGAGTTCATGAACTCGAGTTCATGAACCTCATCATAATTCTTTTT-3'**

**shFABP6 #012 (TRCN0000447012)**

**5'-CCGGTATGAGCGCGTGAGCAAGAGACTCGAGTCTCTTGCTCACGCGCTCATATTTTT-3'**

---



**Supplementary Table S3. The information of antibody**

| <b>Name</b>                     | <b>Species</b> | <b>Brand</b>     | <b>Cat NO.</b>    |
|---------------------------------|----------------|------------------|-------------------|
| <b>GAPDH</b>                    | <b>Rb</b>      | <b>CST</b>       | <b>5174S</b>      |
| <b>Atg12</b>                    | <b>Rb</b>      | <b>CST</b>       | <b>2010P</b>      |
| <b>Caspase3</b>                 | <b>Rb</b>      | <b>CST</b>       | <b>9661S</b>      |
| <b>Caspase8</b>                 | <b>Ms</b>      | <b>CST</b>       | <b>9746S</b>      |
| <b>CyclinA1+A2</b>              | <b>Rb</b>      | <b>Abcam</b>     | <b>Ab185619</b>   |
| <b>E-cadherin</b>               | <b>Rb</b>      | <b>BD</b>        | <b>610181</b>     |
| <b>FABP6</b>                    | <b>Rb</b>      | <b>Novus</b>     | <b>NBP1-32482</b> |
| <b>LC3B</b>                     | <b>Rb</b>      | <b>CST</b>       | <b>3868S</b>      |
| <b>N-cadherin</b>               | <b>MS</b>      | <b>BD</b>        | <b>610920</b>     |
| <b>PARP</b>                     | <b>Rb</b>      | <b>CST</b>       | <b>9532S</b>      |
| <b>p21</b>                      | <b>Rb</b>      | <b>CST</b>       | <b>2947T</b>      |
| <b>p-p53</b>                    | <b>Rb</b>      | <b>CST</b>       | <b>9284S</b>      |
| <b>p53</b>                      | <b>Rb</b>      | <b>CST</b>       | <b>9282S</b>      |
| <b>p-p65 (S536)</b>             | <b>Rb</b>      | <b>Abcam</b>     | <b>ab86299</b>    |
| <b>p65</b>                      | <b>Rb</b>      | <b>CST</b>       | <b>8242S</b>      |
| <b>p-ERK</b>                    | <b>Rb</b>      | <b>CST</b>       | <b>4377S</b>      |
| <b>ERK1/2</b>                   | <b>Rb</b>      | <b>CST</b>       | <b>9102S</b>      |
| <b>p-p38</b>                    | <b>Ms</b>      | <b>Millipore</b> | <b>MABS64</b>     |
| <b>p38</b>                      | <b>Rb</b>      | <b>Abcam</b>     | <b>ab7952</b>     |
| <b>p-mTOR</b>                   | <b>Rb</b>      | <b>CST</b>       | <b>5536S</b>      |
| <b>mTOR</b>                     | <b>Rb</b>      | <b>CST</b>       | <b>2972S</b>      |
| <b>p-AKT (T308)</b>             | <b>Rb</b>      | <b>CST</b>       | <b>13038S</b>     |
| <b>AKT</b>                      | <b>Rb</b>      | <b>Epitomics</b> | <b>1085-1</b>     |
| <b>RXR <math>\alpha</math></b>  | <b>Rb</b>      | <b>CST</b>       | <b>3085</b>       |
| <b>PPAR <math>\gamma</math></b> | <b>Rb</b>      | <b>CST</b>       | <b>2435</b>       |
